# Supplementary material
Source: publisher figshare collection journal article supplement (https://tandf.figshare.com/ndownloader/files/20281626)

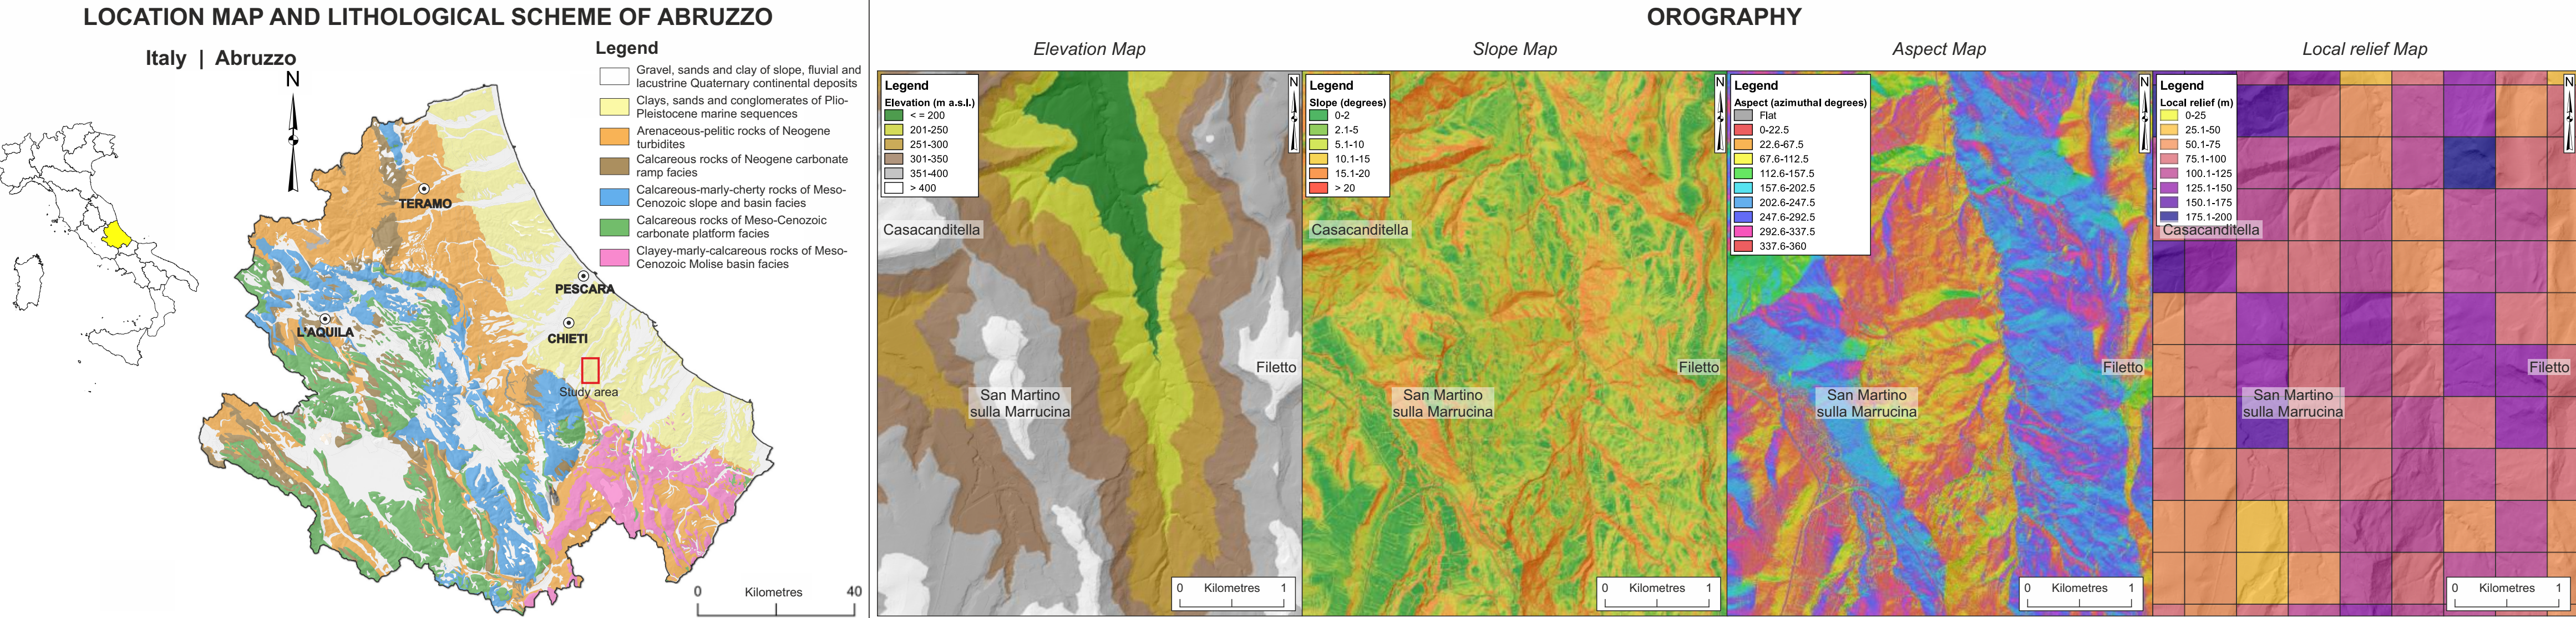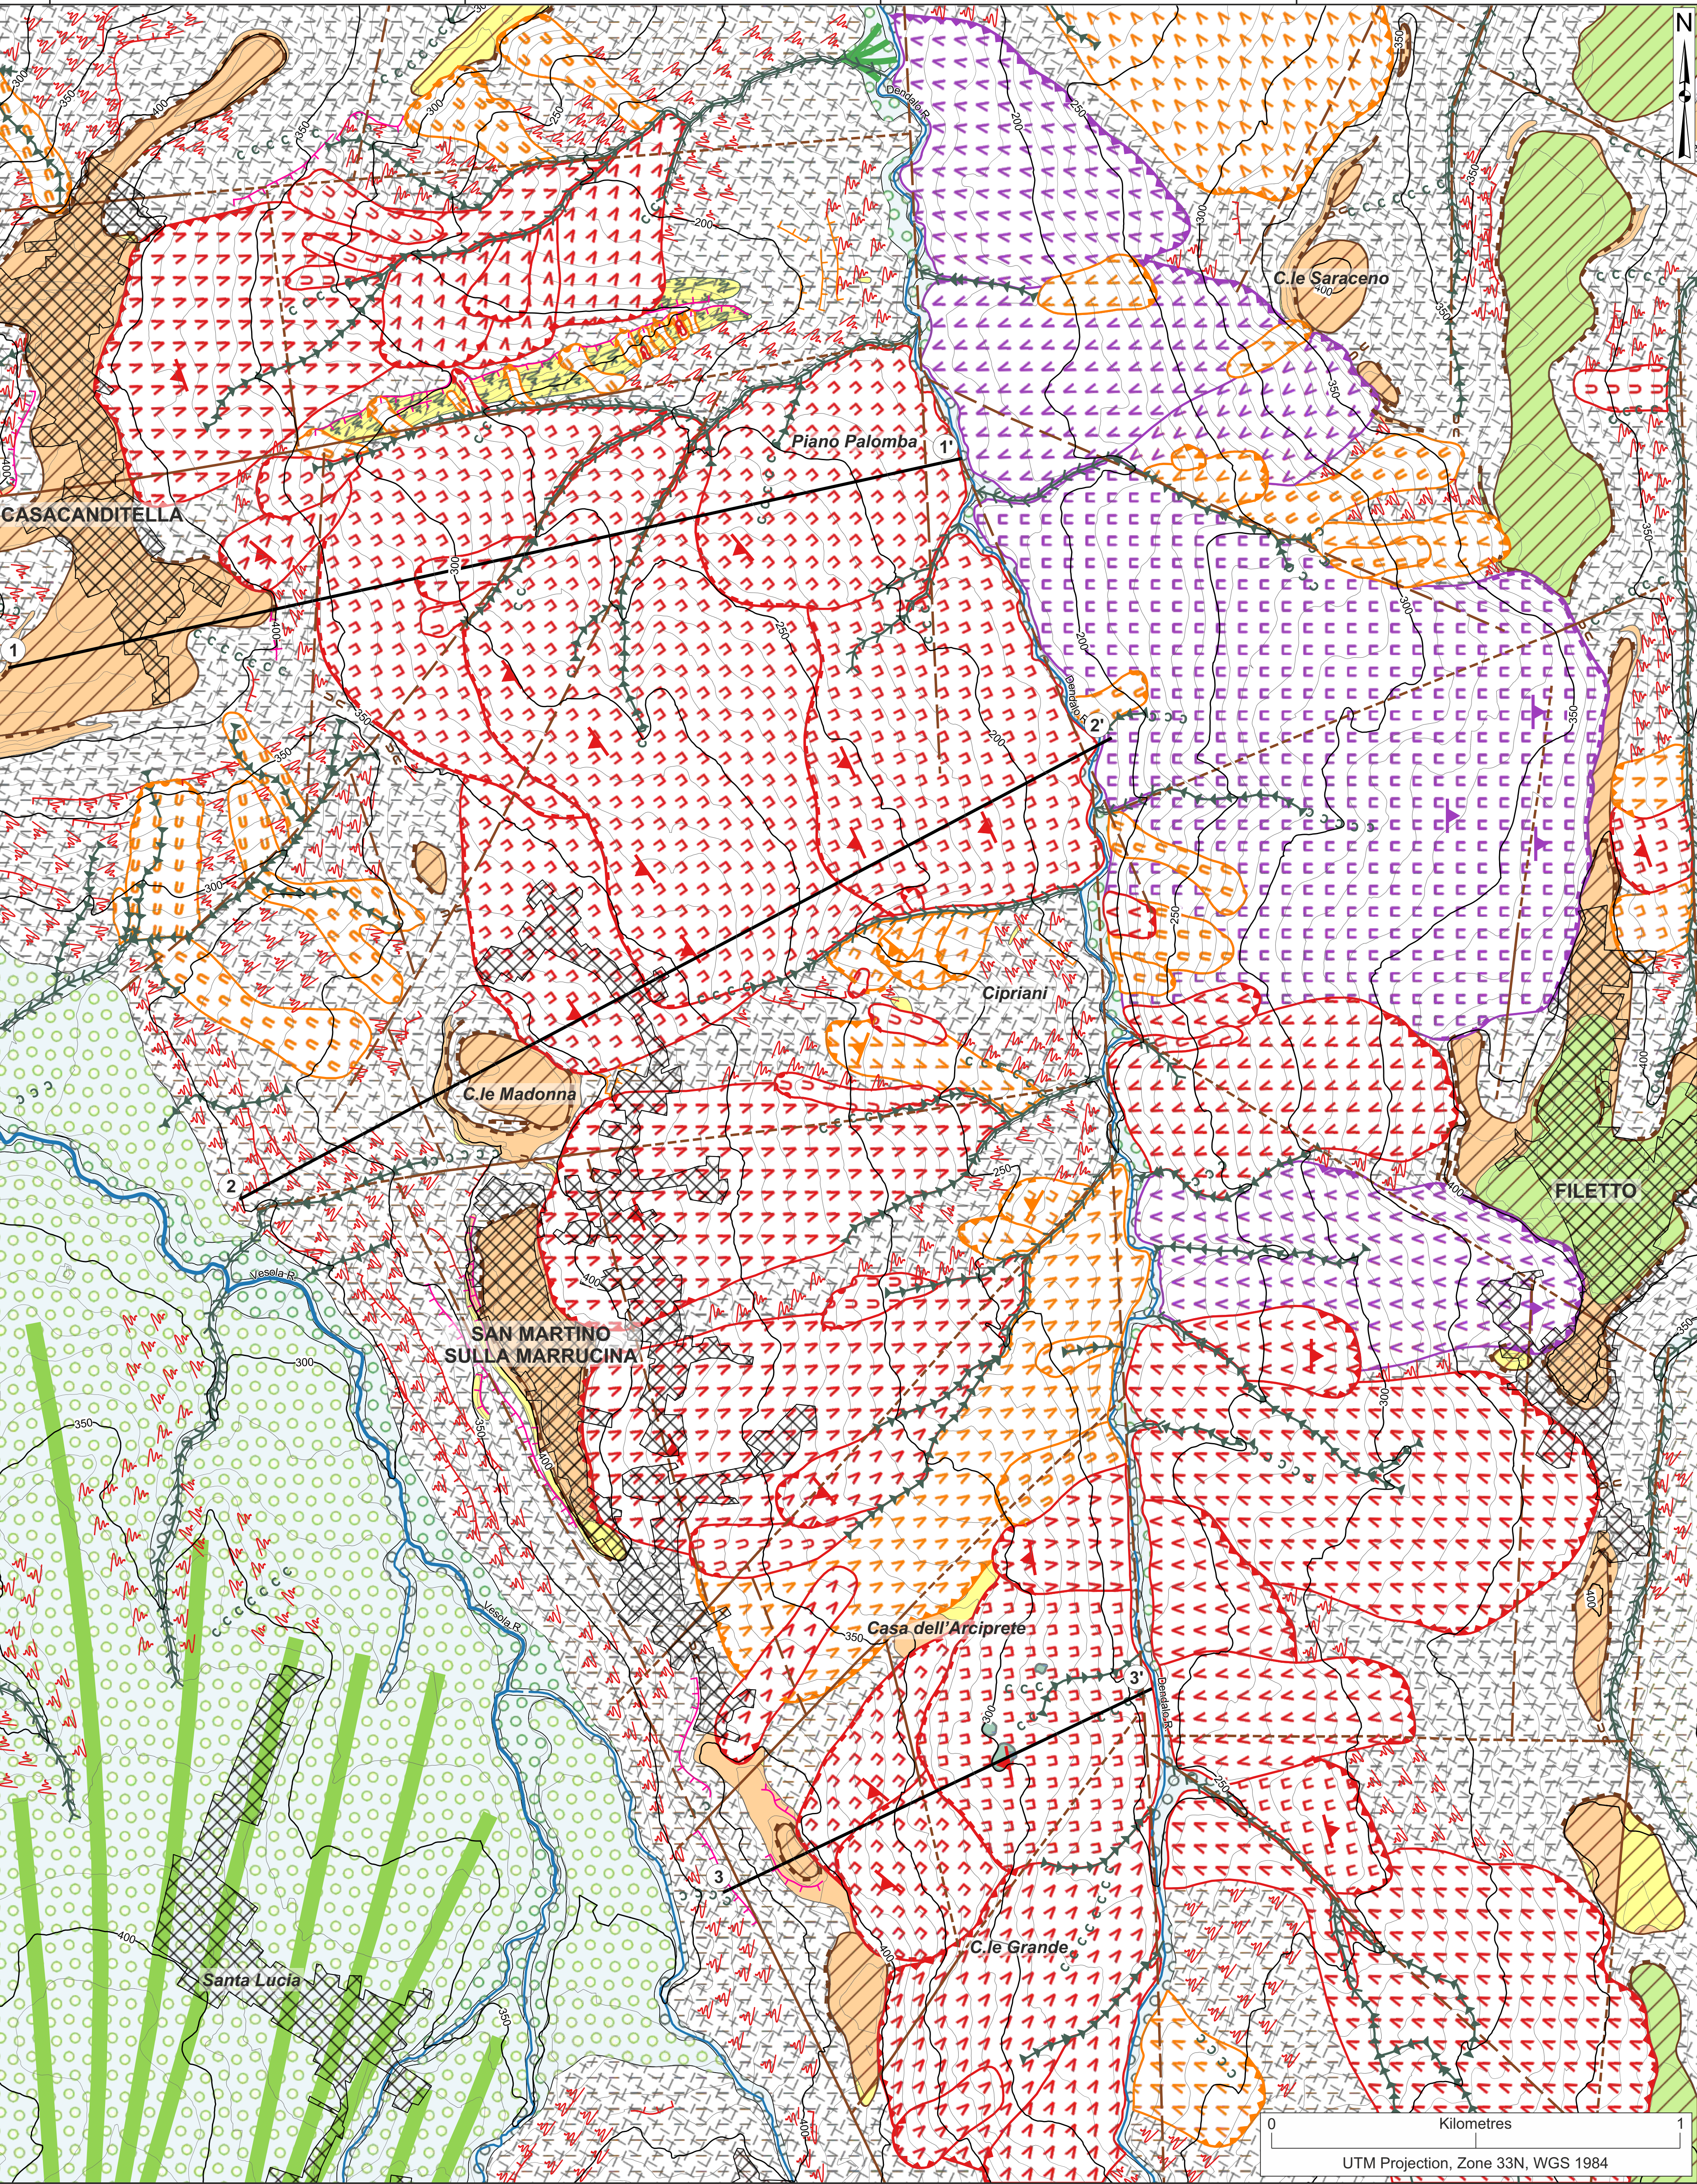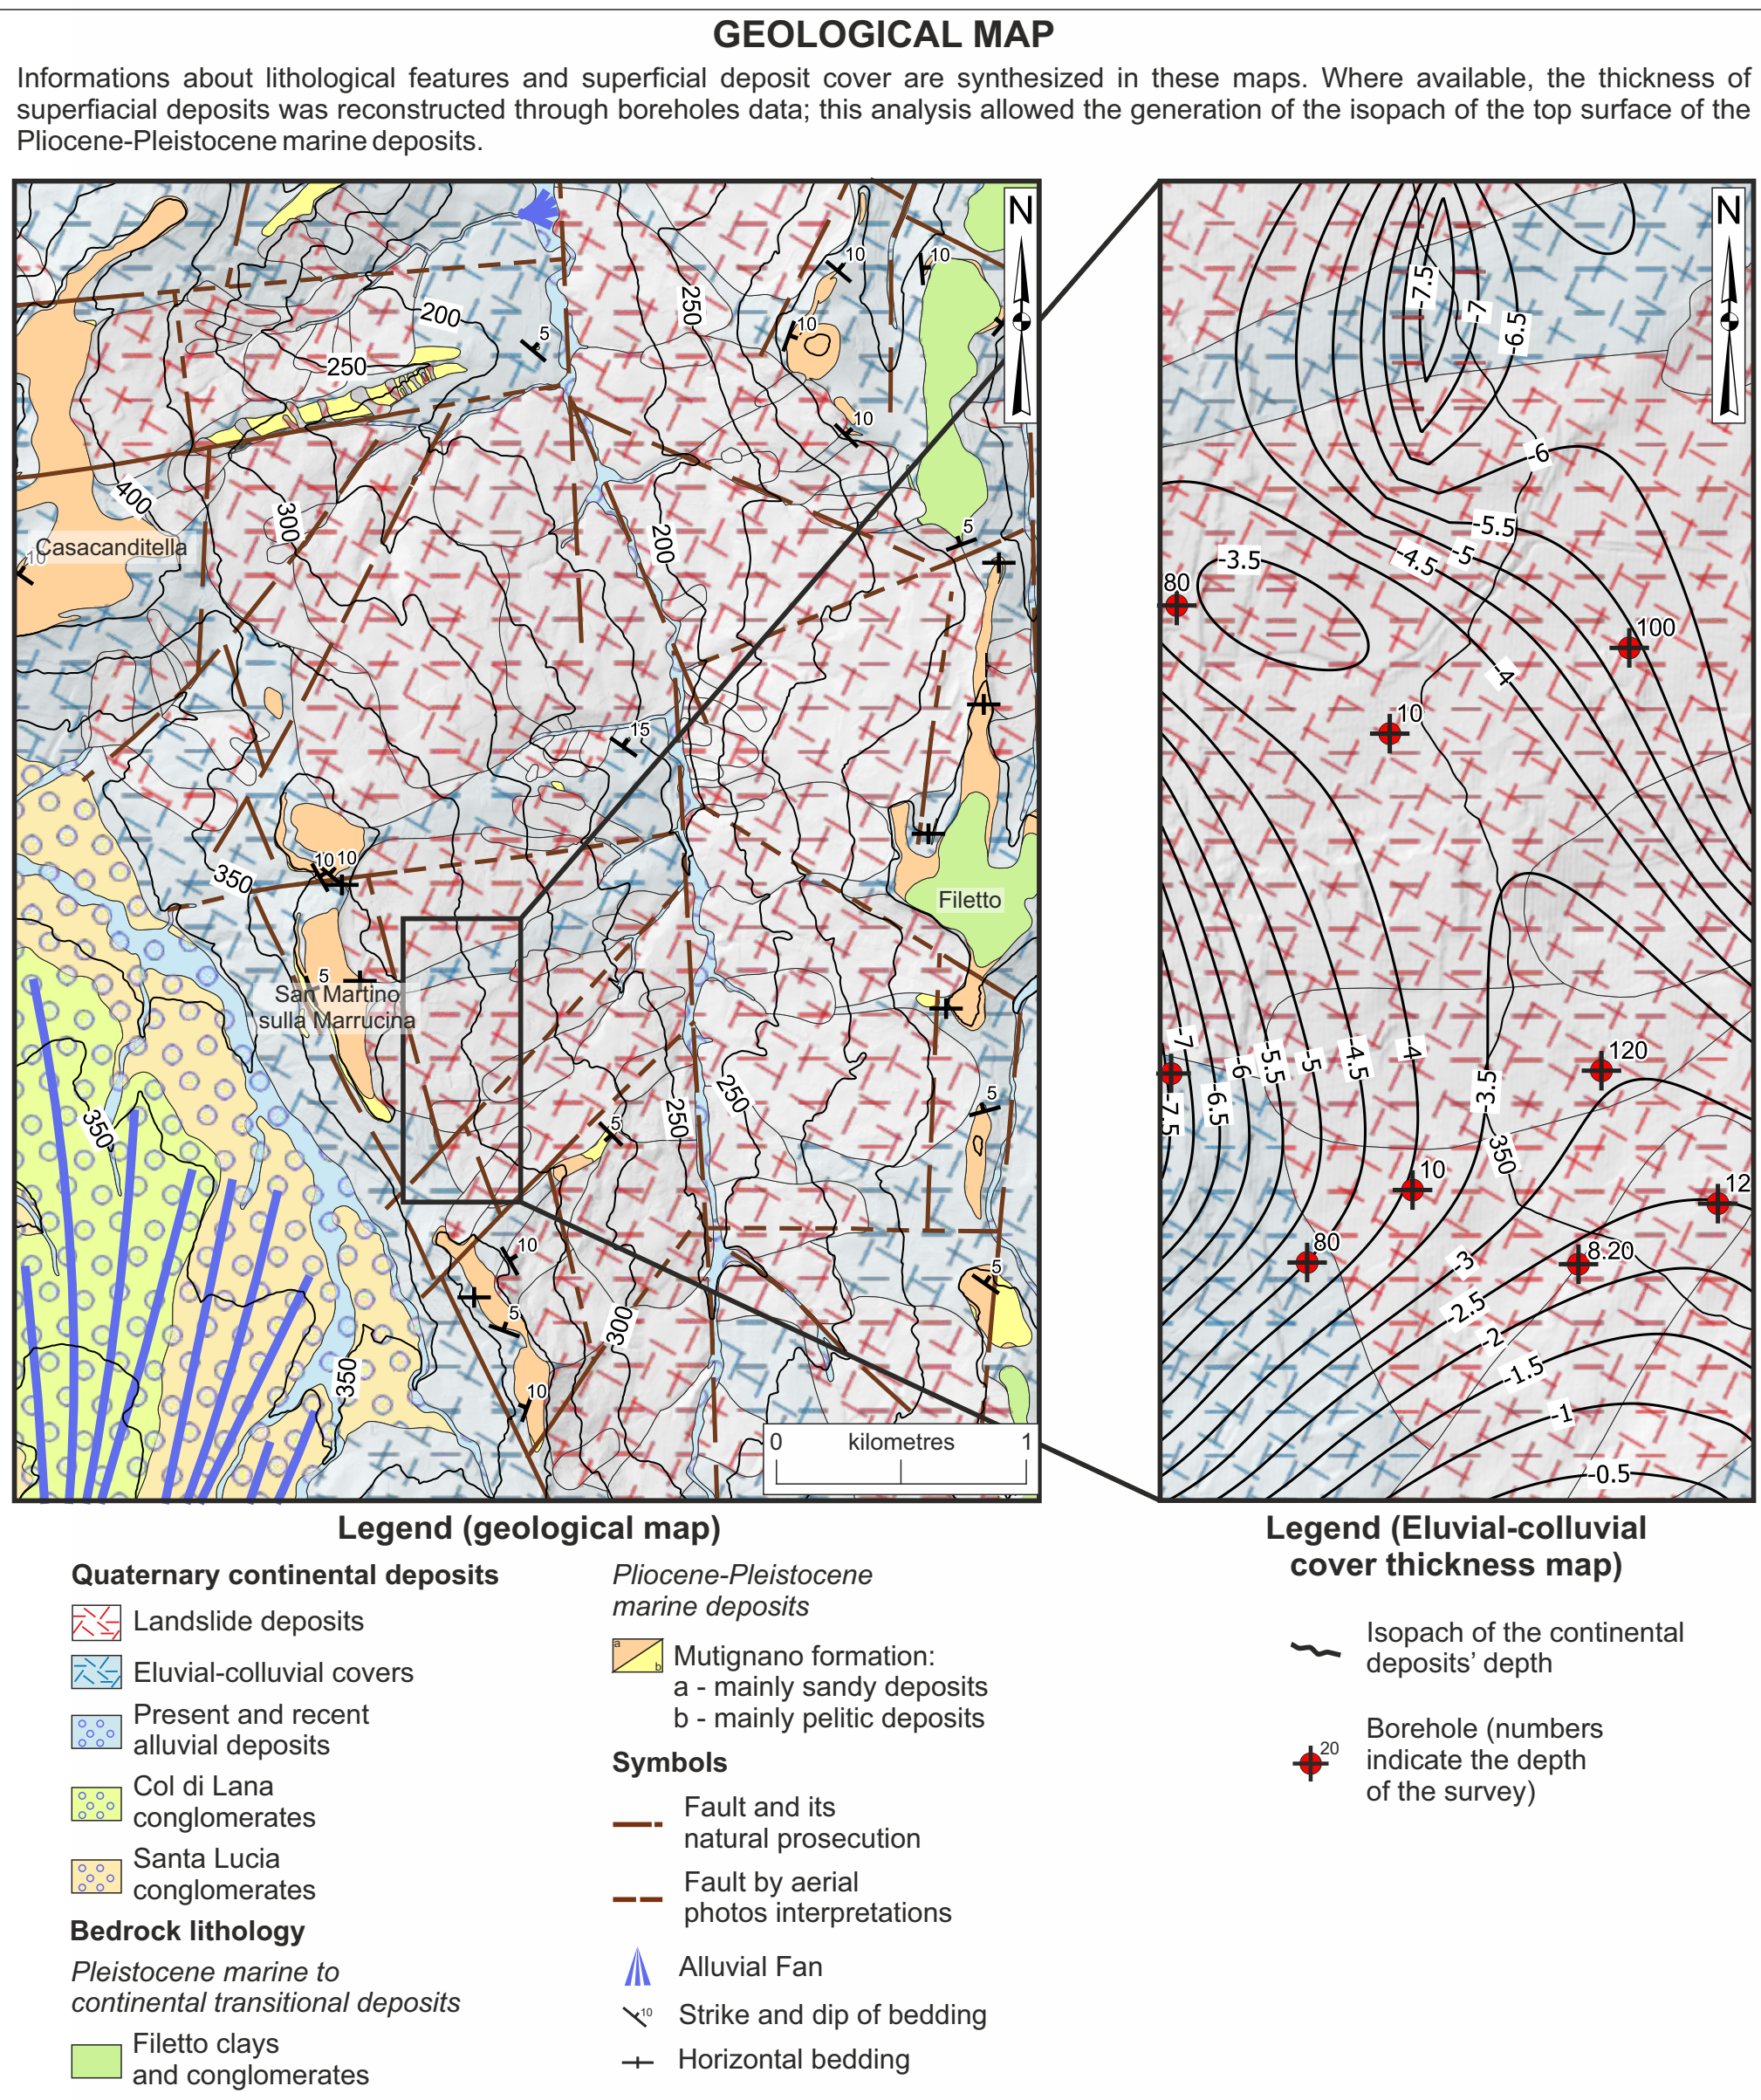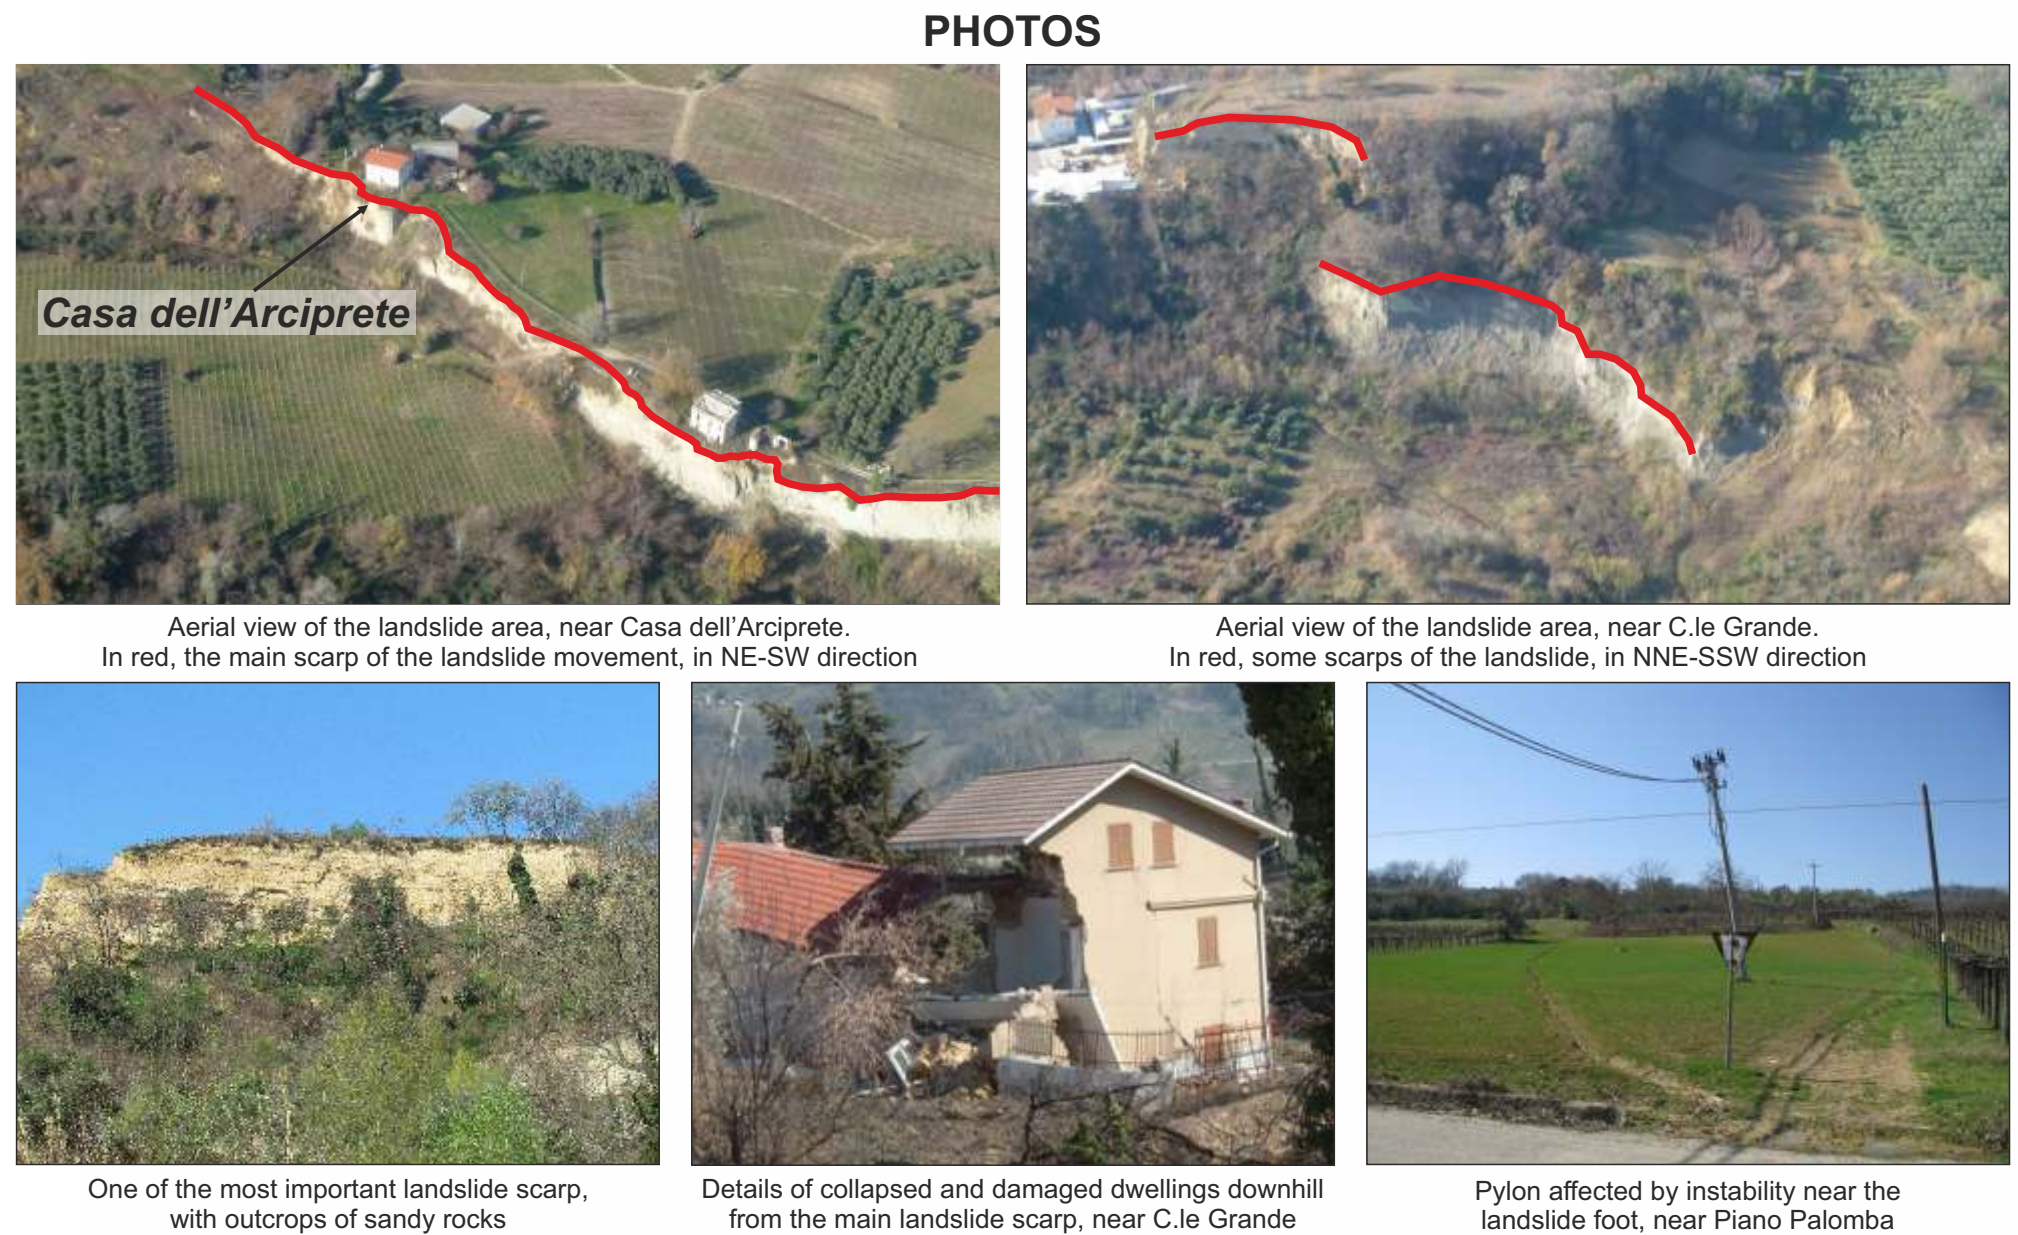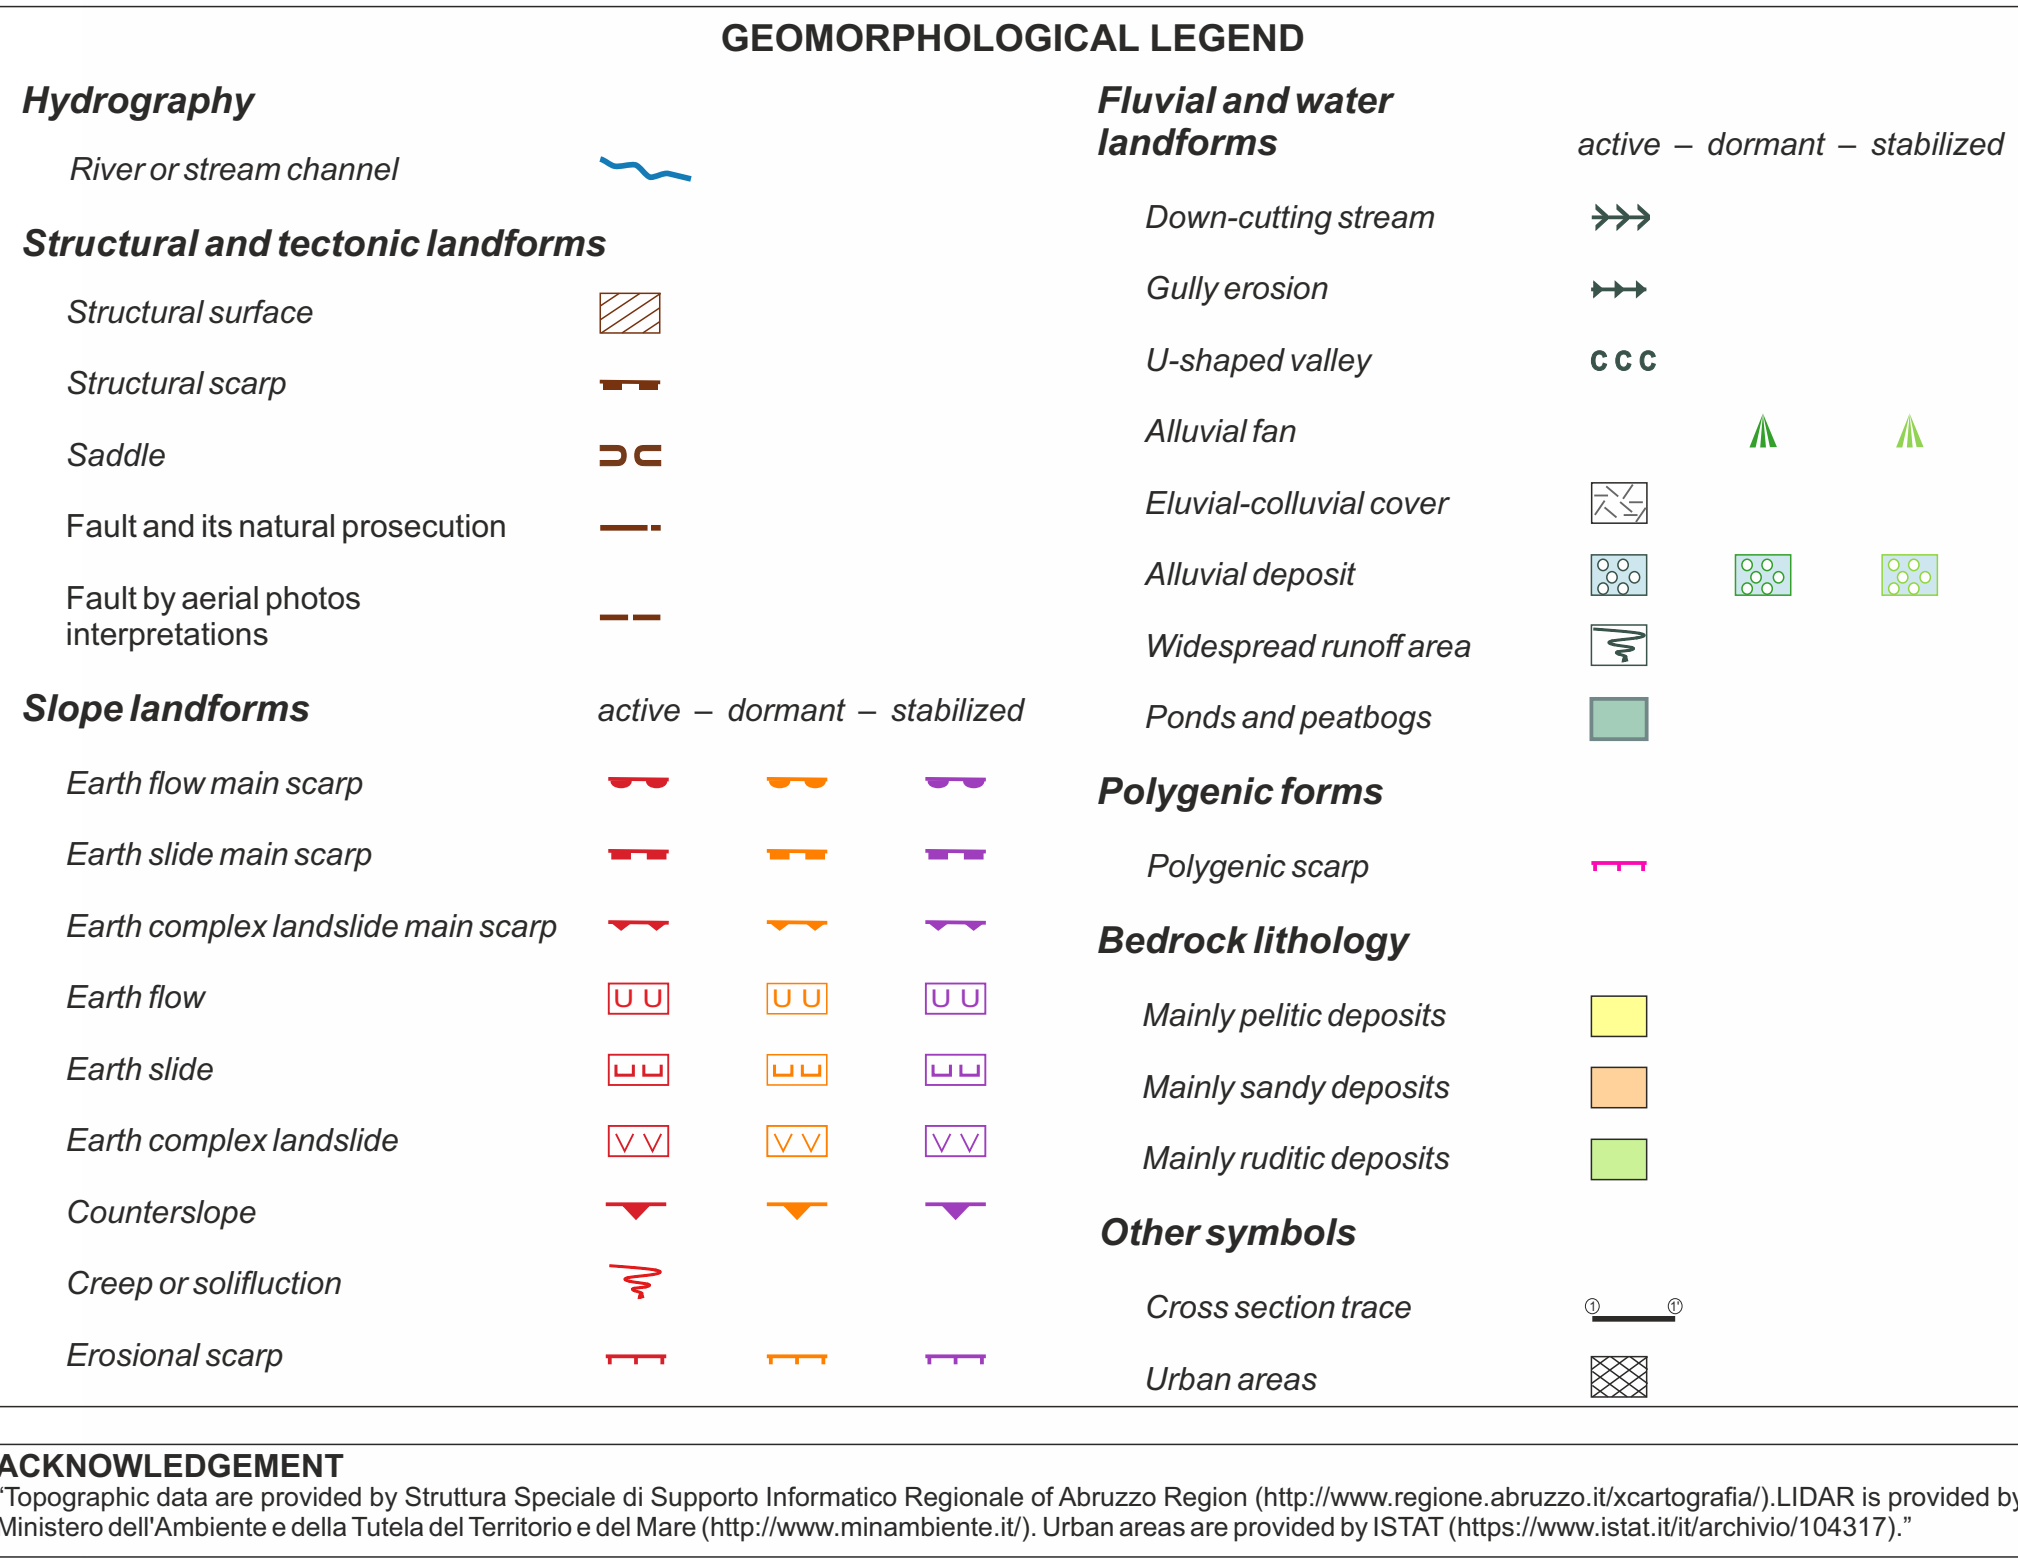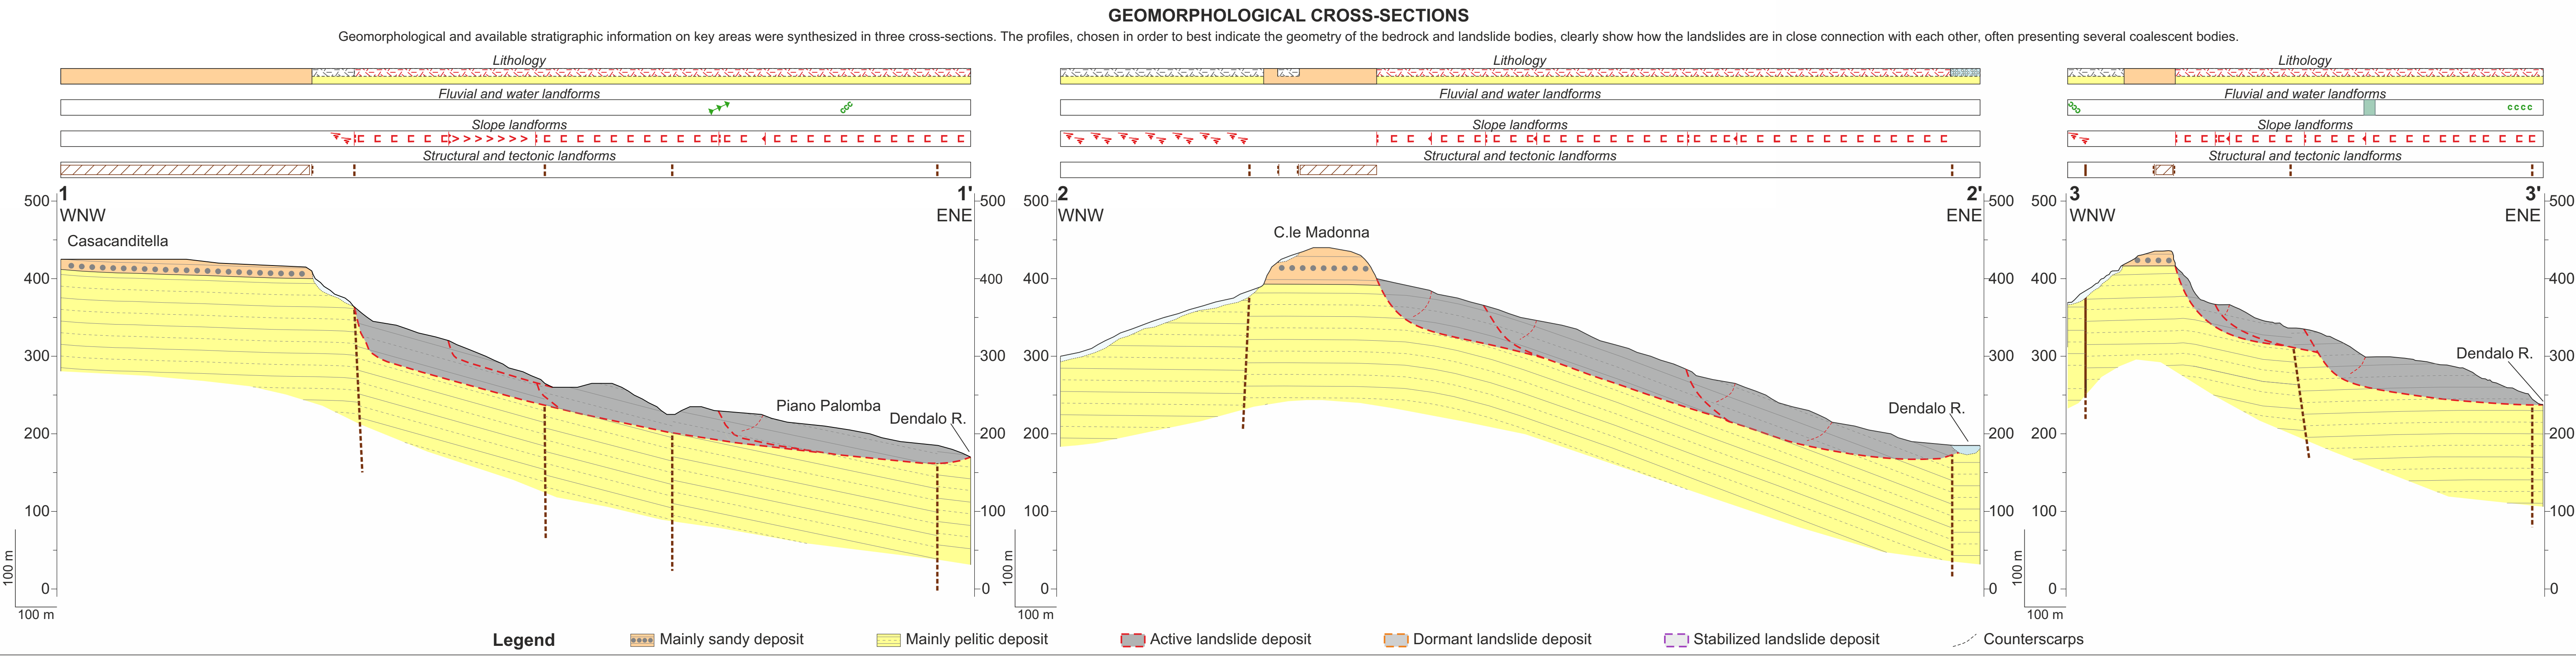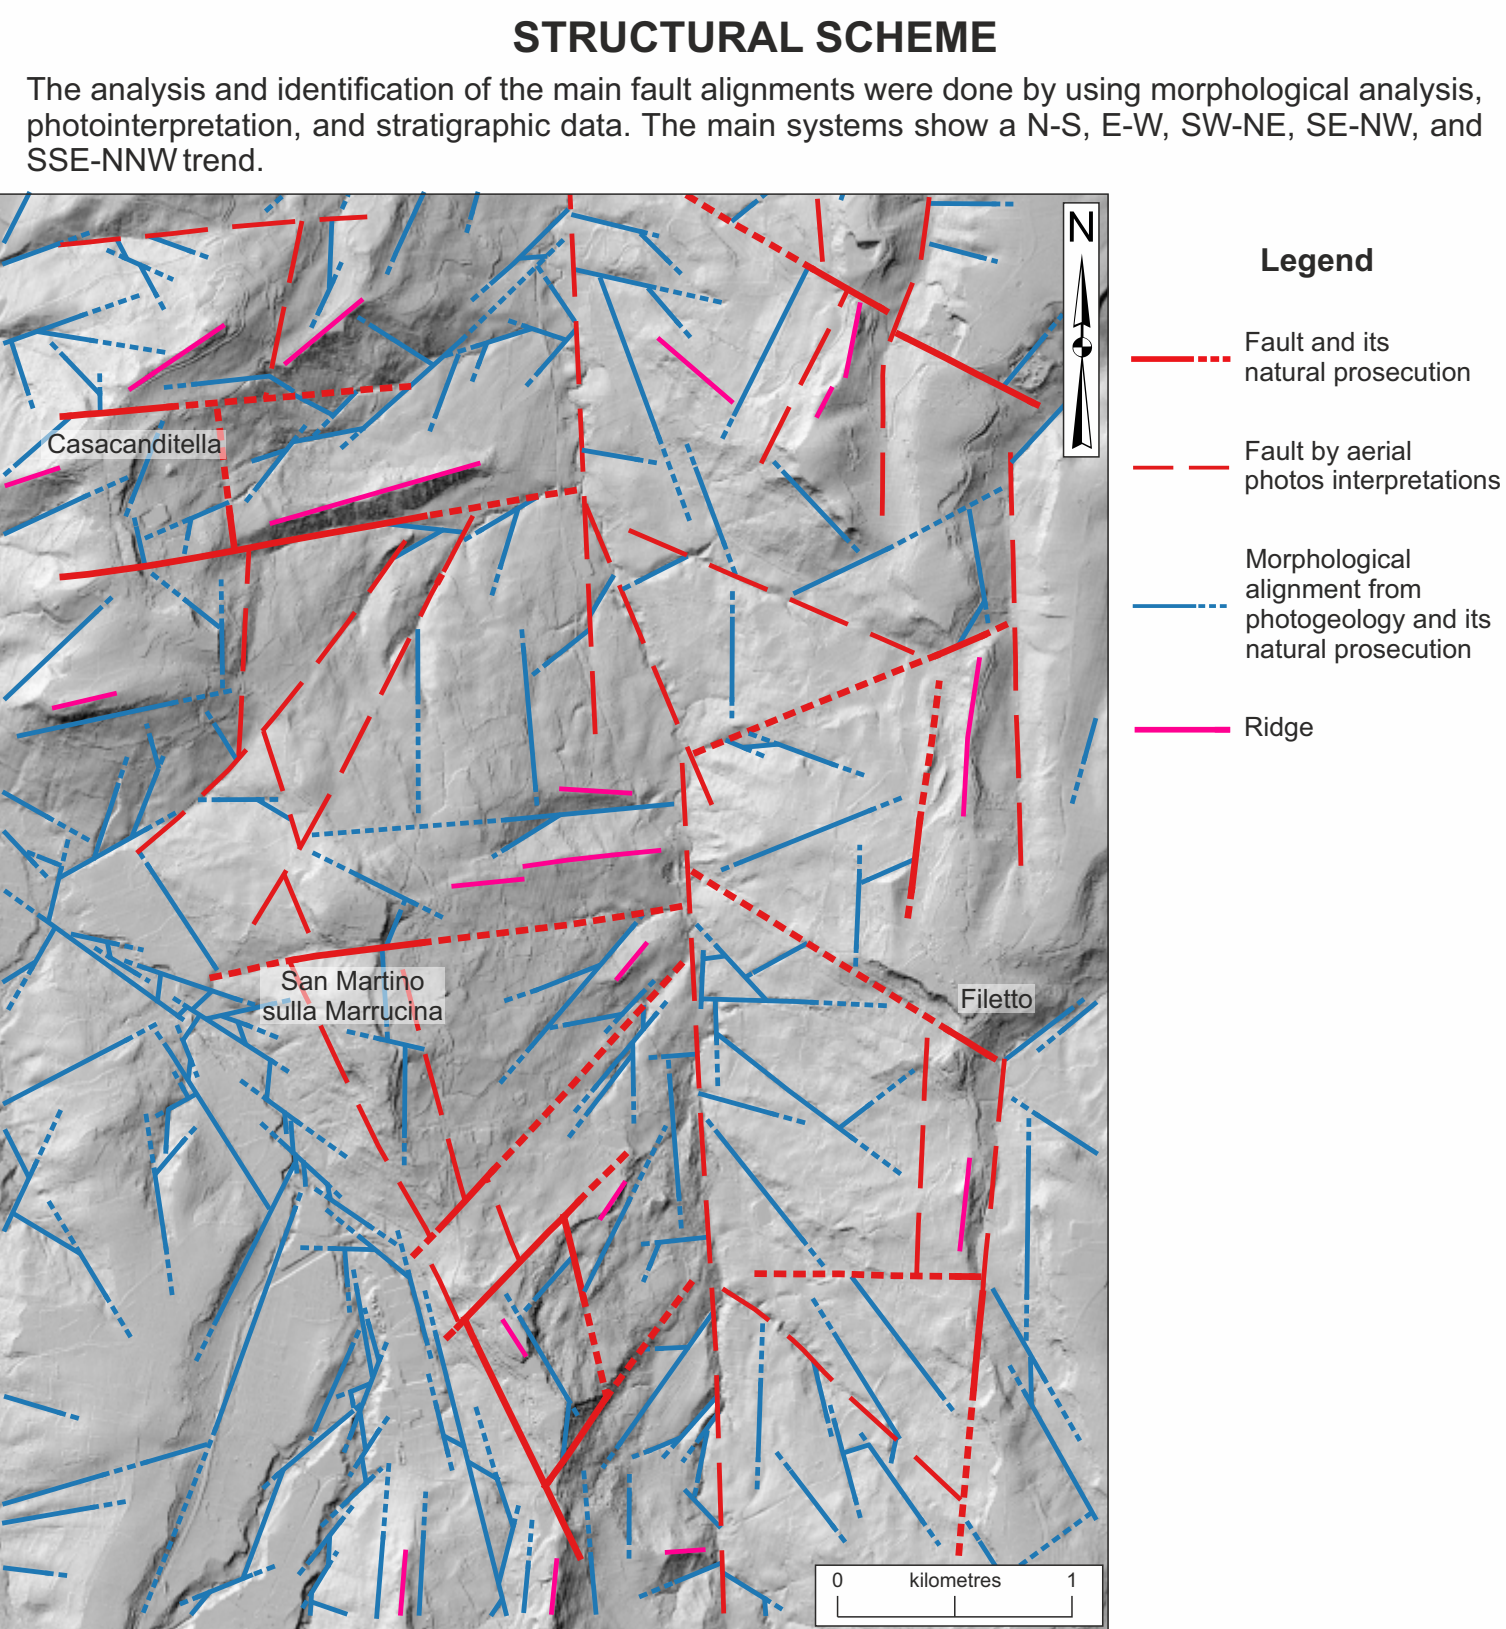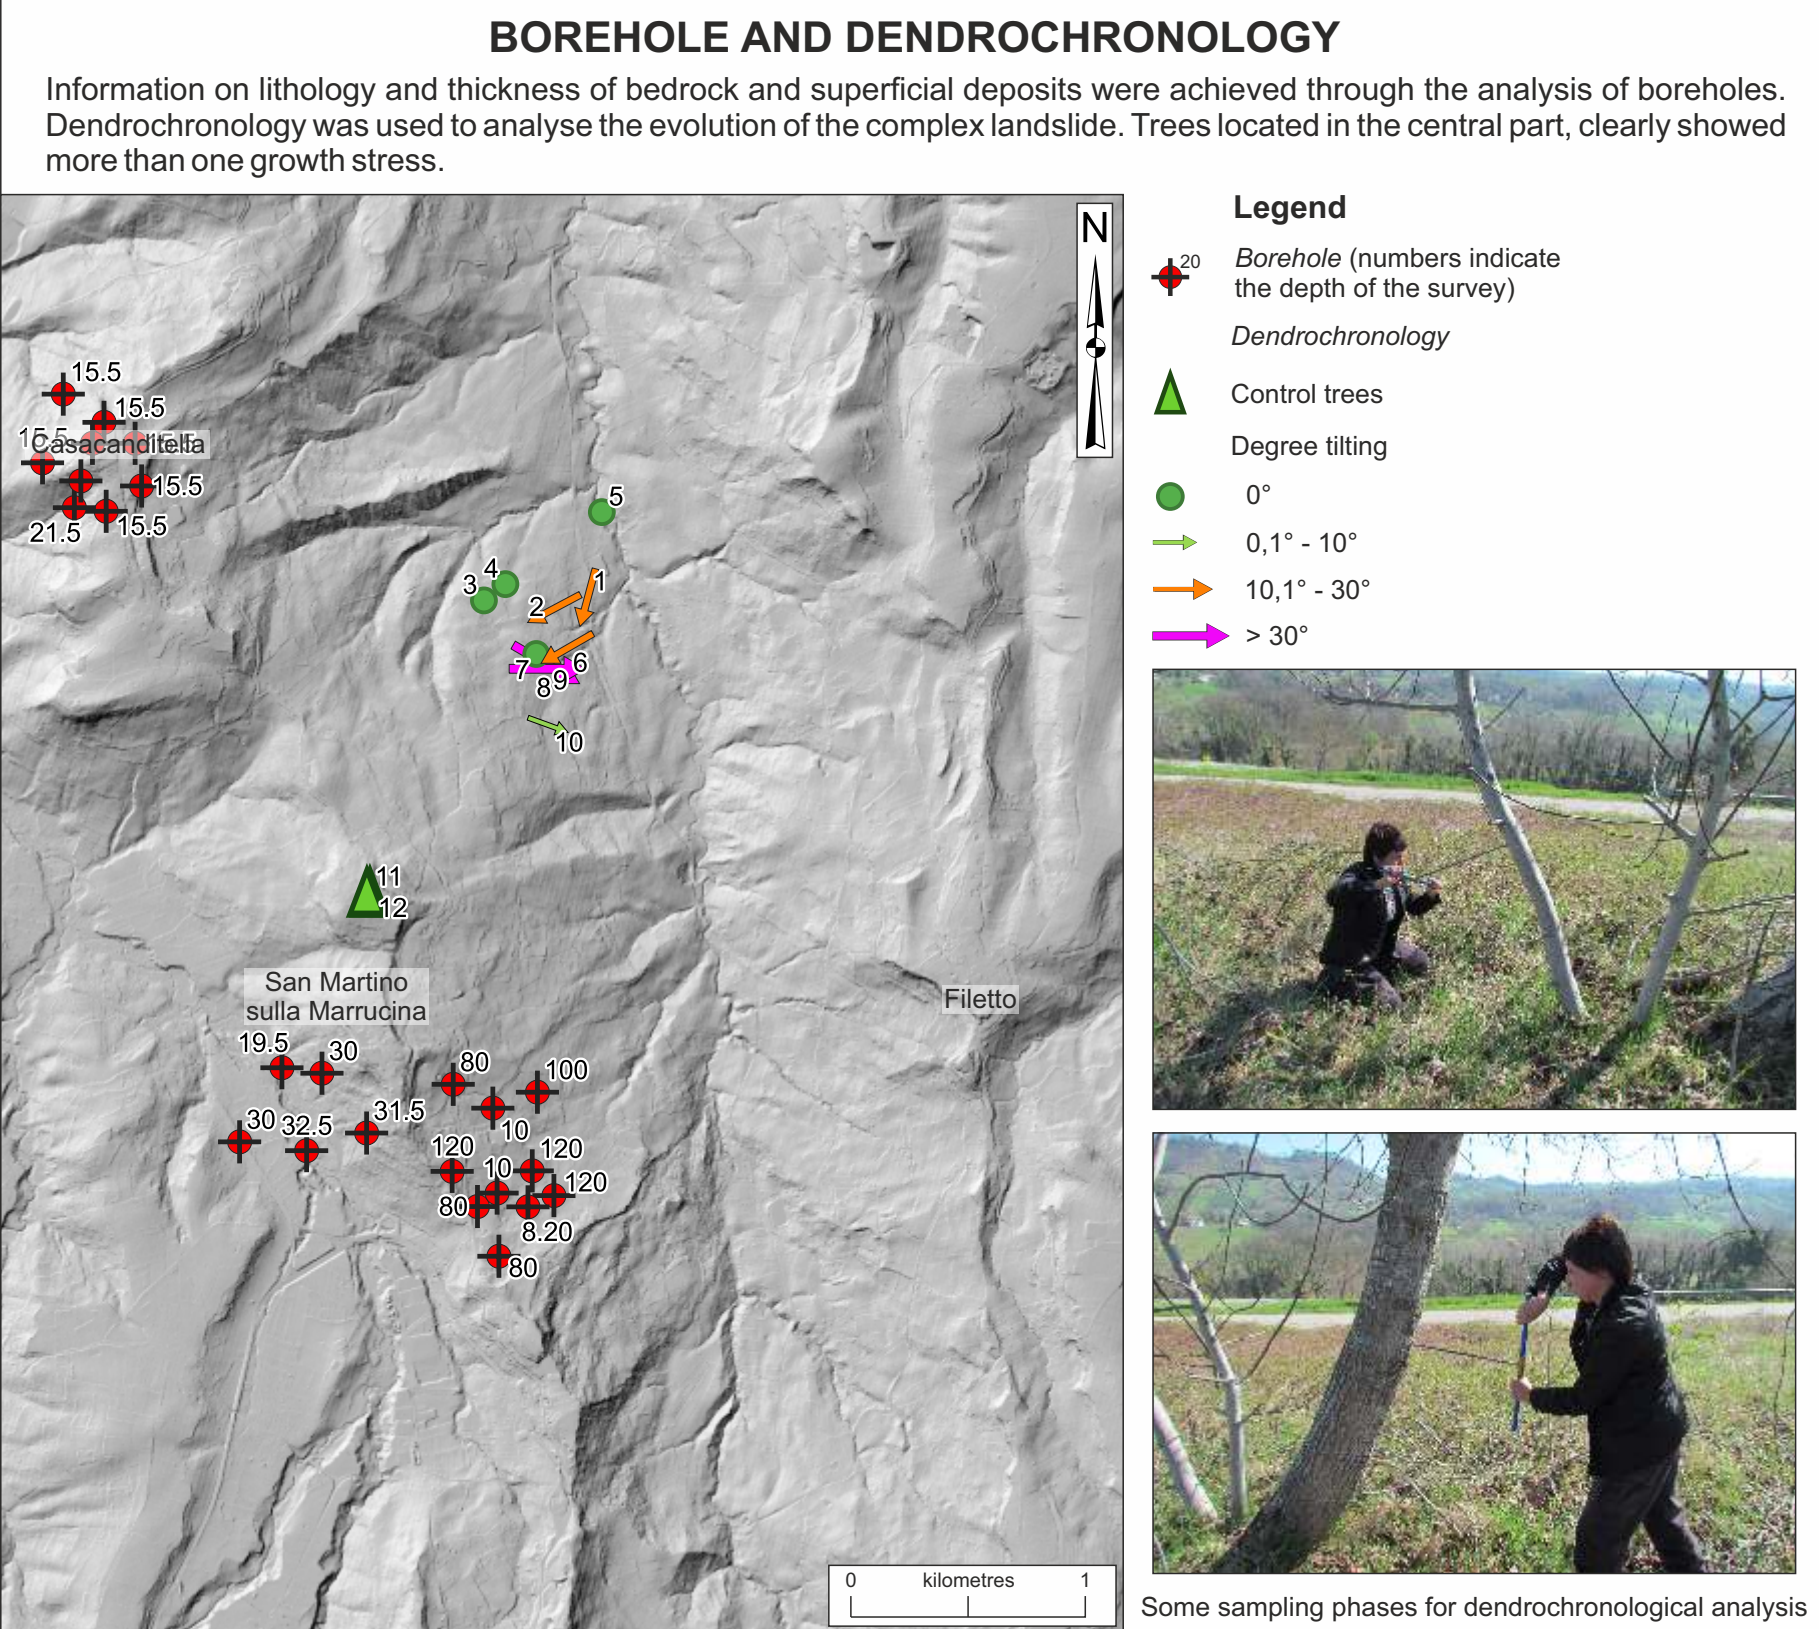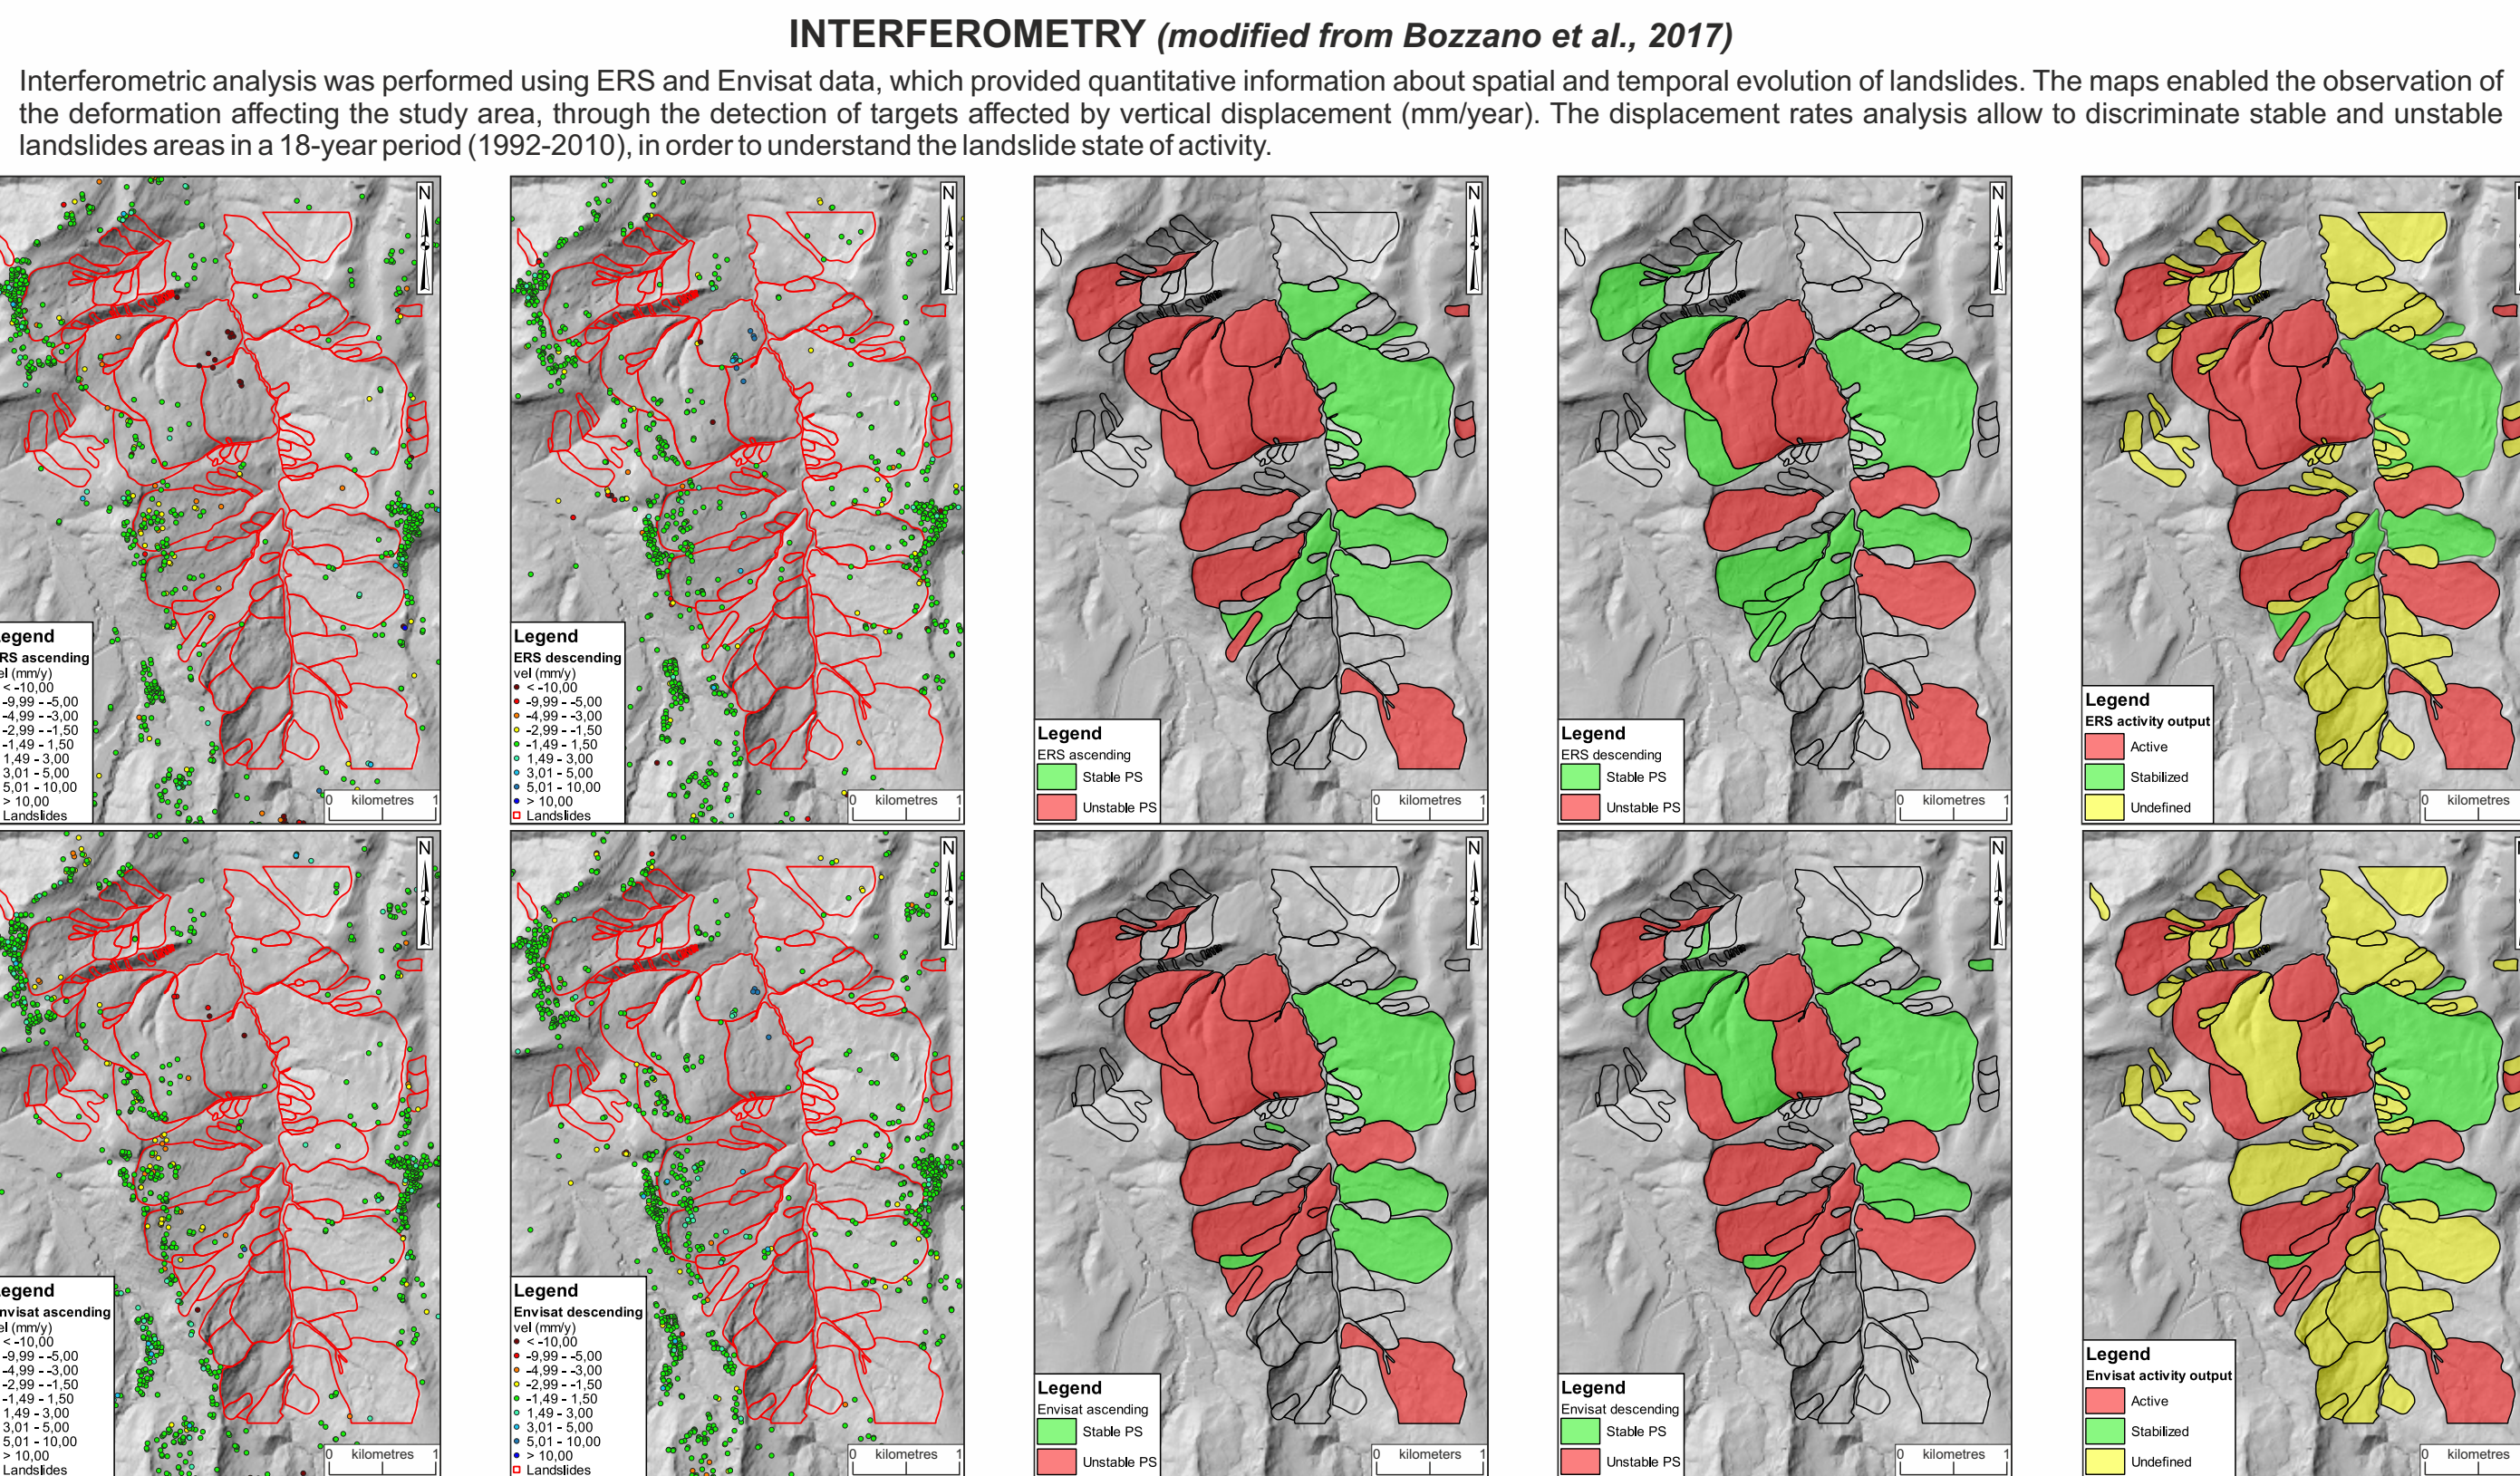

Supplement: Supplementary file 1 [file 20281626]
